# Supplementary material
Source: publisher figshare collection journal article supplement (https://acs.figshare.com/ndownloader/files/17764469)
Supplement: Supplementary file 1 [file 17764469]

## **Exploring the efficacy of Nile red in microplastic quantification: a co-staining approach**

Thomas Stanton<sup>1,3\*</sup>; Matthew Johnson<sup>1</sup>; Paul Nathanail<sup>2</sup>; Rachel L Gomes<sup>3</sup>; Teresa Needham<sup>1</sup>; Amanda Burson<sup>1</sup>

1. School of Geography, University of Nottingham, NG7 2RD, UK
2. Land Quality Management Ltd, University of Nottingham Innovation Park, NG7 2TU, UK
3. Food, Water, Waste Research Group, Faculty of Engineering, University of Nottingham, NG7 2RD, UK

\*Corresponding author: [thomas.stanton@nottingham.ac.uk](mailto:thomas.stanton@nottingham.ac.uk)

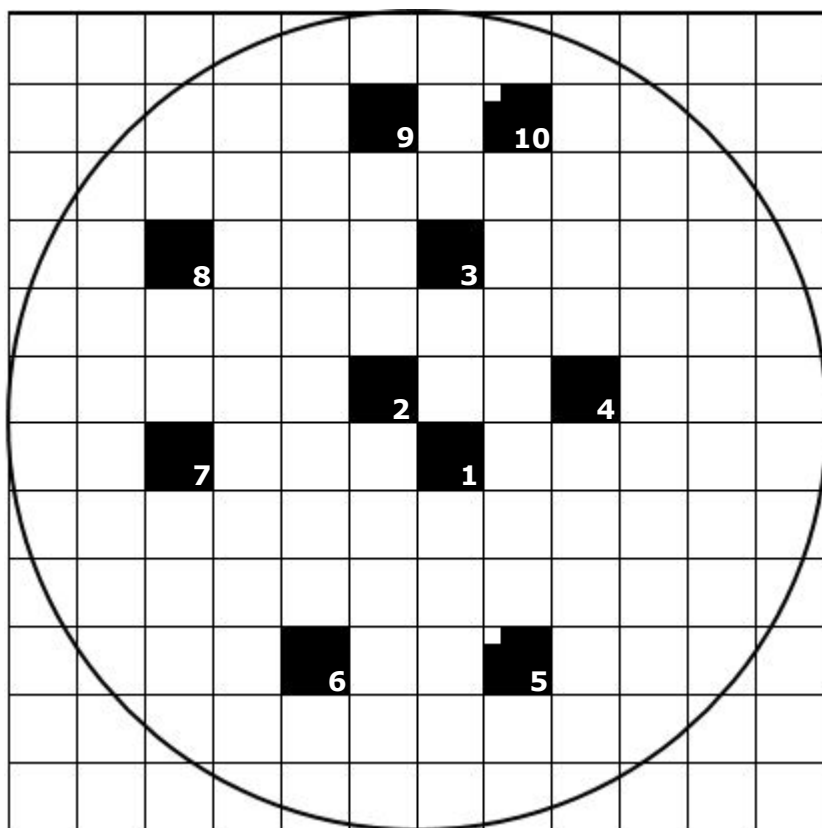

**Figure S1: The cells on the gridded filter papers that were observed at 40 x magnification in each sample. The two cells with the white square within them were also observed at 100x magnification.**

| Particle                                   | Nile red image                                                                      | DAPI or true color image                                                              |
|--------------------------------------------|-------------------------------------------------------------------------------------|---------------------------------------------------------------------------------------|
| Possible microplastic particle             | 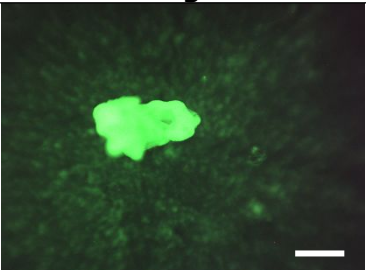   |    |
| Invertebrate                               |    |    |
| Bundle of fibers                           |   |   |
| Black particles exhibiting uneven staining |  |  |
| Natural textile fiber                      |  |  |

**Figure S2: Nile Red and DAPI images of natural and possible microplastic particles stained in samples of river water. All images taken at 40x magnification and the scale bar represents 500  $\mu$ m**

**Table S1: Table of known plastic particles and natural and synthetic fibers, detailing their color, autofluorescence at the green and blue wavelengths used to assess Nile red and DAPI staining respectively (see section 2.3), and affinity with Nile Red and DAPI fluorescent stains where autofluorescence was not observed.**

| Polymer          | Color       | Autofluorescence |      | Nile red fluorescence? | DAPI fluorescence? |
|------------------|-------------|------------------|------|------------------------|--------------------|
|                  |             | Green            | Blue |                        |                    |
| <b>PP</b>        | Transparent | No               | No   | Yes                    | No                 |
|                  | Orange      | No               | No   | Yes                    | No                 |
|                  | Blue        | No               | Yes  | Yes                    | -                  |
|                  | Red         | No               | No   | Yes                    | No                 |
|                  | Black       | No               | No   | Yes - at edges only    | No                 |
| <b>HDPE</b>      | Translucent | No               | No   | Yes                    | No                 |
|                  | Brown       | No               | No   | Yes - at edges only    | No                 |
| <b>EPS</b>       | White       | No               | No   | Yes                    | No                 |
| <b>PVC</b>       | White       | Yes              | No   | -                      | No                 |
| <b>Polyester</b> | Black       | No               | No   | No                     | No                 |
| <b>Polyamide</b> | Red         | No               | Yes  | No                     | -                  |
|                  | Grey        | No               | Yes  | Yes                    | -                  |
| <b>Acrylic</b>   | Blue        | No               | No   | No                     | No                 |
|                  | Orange      | No               | No   | Yes                    | No                 |
| <b>Cotton</b>    | White       | No               | No   | Yes                    | Yes                |
| <b>Wool</b>      | Light blue  | Yes              | Yes  | -                      | -                  |
|                  | Dark blue   | No               | No   | Yes                    | Yes                |
| <b>Silk</b>      | Blue        | No               | No   | Yes                    | Yes                |
| <b>Rayon</b>     | Blue        | No               | No   | Yes                    | Yes                |

**Table S2: Number of particles that fluoresced with Nile Red and DAPI at 40x and 100x magnification across ten and two cells of the filter area respectively (Figure S1). Significance was calculated using a paired sample t-test for counts at 40x magnification, in which the mean particle counts across these ten grid cells was compared for particles that fluoresced with Nile red, and particles that fluoresced with Nile Red but not DAPI (i.e. suspected microplastics). The paired samples T test could not be calculated at 100x magnification due to only two grid cells being quantified at this magnification.**

| <b>Sample</b>          | <b>Magnification</b> | <b>Particles that fluoresced with Nile Red</b> | <b>Particles that fluoresced with both Nile Red and DAPI</b> | <b>Suspected MPs (particles that only fluoresce with Nile red)</b> | <b>Significance (p=)</b> |
|------------------------|----------------------|------------------------------------------------|--------------------------------------------------------------|--------------------------------------------------------------------|--------------------------|
| <b>River water 1</b>   | 40                   | 33                                             | 22                                                           | 11                                                                 | 0.003                    |
| <b>River water 1</b>   | 100                  | 17                                             | 10                                                           | 7                                                                  |                          |
| <b>River water 2</b>   | 40                   | 31                                             | 15                                                           | 16                                                                 | 0.002                    |
| <b>River water 2</b>   | 100                  | 11                                             | 6                                                            | 5                                                                  |                          |
| <b>River water 3</b>   | 40                   | 74                                             | 8                                                            | 68                                                                 | 0.087                    |
| <b>River water 3</b>   | 100                  | 16                                             | 6                                                            | 10                                                                 |                          |
| <b>Bottled water 1</b> | 40                   | 14                                             | 12                                                           | 2                                                                  | 0.005                    |
| <b>Bottled water 1</b> | 100                  | 14                                             | 13                                                           | 1                                                                  |                          |
| <b>Bottled water 2</b> | 40                   | 3                                              | 2                                                            | 1                                                                  | 0.168                    |
| <b>Bottled water 2</b> | 100                  | 5                                              | 3                                                            | 2                                                                  |                          |
| <b>Bottled water 3</b> | 40                   | 9                                              | 9                                                            | 0                                                                  | 0.019                    |
| <b>Bottled water 3</b> | 100                  | 11                                             | 8                                                            | 3                                                                  |                          |
| <b>Bottled water 4</b> | 40                   | 15                                             | 6                                                            | 9                                                                  | 0.024                    |
| <b>Bottled water 4</b> | 100                  | 18                                             | 10                                                           | 8                                                                  |                          |
| <b>Canned water</b>    | 40                   | 28                                             | 13                                                           | 15                                                                 | 0.001                    |
| <b>Canned water</b>    | 100                  | 70                                             | 57                                                           | 13                                                                 |                          |
| <b>Tap water</b>       | 40                   | 24                                             | 18                                                           | 6                                                                  | 0.001                    |
| <b>Tap water</b>       | 100                  | 20                                             | 12                                                           | 8                                                                  |                          |

**Table S3: The material, color, and autofluorescence of different parts of the containers of drinking water samples. The lid of bottled water 4 had two parts.**

| Sample          |           | Material      | Color       | Autofluorescence |      |
|-----------------|-----------|---------------|-------------|------------------|------|
|                 |           |               |             | Green            | Blue |
| Bottled water 1 | Lid       | HDPE          | Light blue  | N                | N    |
|                 | Body      | PET           | Transparent | Y                | Y    |
| Bottled water 2 | Lid       | HDPE          | Green       | N                | N    |
|                 | Body      | PET           | Transparent | Y                | Y    |
| Bottled water 3 | Lid       | HDPE          | Dark blue   | N                | N    |
|                 | Body      | PET           | Transparent | Y                | Y    |
| Bottled water 4 | Lid inner | HDPE          | White       | N                | N    |
|                 | Lid outer | PP            | Dark blue   | N                | N    |
|                 | Body      | PET           | Transparent | Y                | Y    |
| Canned water    | Lid       | Polypropylene | Black       | N                | N    |
|                 | Body      | Aluminium     | N/A         |                  |      |

**Table S4: Abundance of autofluorescing particles across the six drinking water samples.**

| Sample          | Magnification | Autofluorescence |      |
|-----------------|---------------|------------------|------|
|                 |               | Green            | Blue |
| Bottled water 1 | 40            | 0                | 5    |
| Bottled water 1 | 100           | 0                | 1    |
| Bottled water 2 | 40            | 0                | 5    |
| Bottled water 2 | 100           | 0                | 0    |
| Bottled water 3 | 40            | 0                | 0    |
| Bottled water 3 | 100           | 0                | 0    |
| Bottled water 4 | 40            | 0                | 2    |
| Bottled water 4 | 100           | 0                | 2    |
| Canned water    | 40            | 2                | 4    |
| Canned water    | 100           | 1                | 2    |
| Tap water       | 40            | 0                | 8    |
| Tap water       | 100           | 0                | 3    |
